# Supplementary material for: Can playing Spirograph lead to an ordered structure in self-propelled particles?
Source: Royal Society of Chemistry journal article supplement (doi:10.1039/d1sm01050f), 2021-01-01
Supplement: d1sm01050f1.pdf [file d1sm01050f1.pdf]

The yellow spheres are SPP and grey sphere is th AP,  $K_F = 0$  and  $Pe = \infty$ .

| Number of Swimmers | $q_4$    | $q_6$    | Image from Simulation                                                                 |
|--------------------|----------|----------|---------------------------------------------------------------------------------------|
| 3                  | 0.375    | 0.740829 | 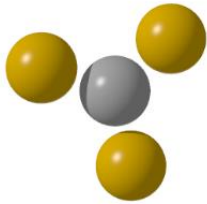   |
| 4                  | 0.509175 | 0.628539 |    |
| 5                  | 0.625    | 0.455607 |   |
| 6                  | 0.763763 | 0.353553 |  |
| 7                  | 0.452576 | 0.326649 |  |

|    |          |          |                                                                                       |
|----|----------|----------|---------------------------------------------------------------------------------------|
| 8  | 0.334536 | 0.296307 | 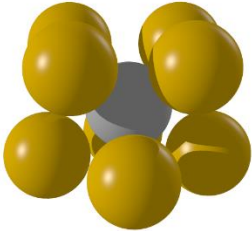   |
| 9  | 0.137526 | 0.357714 |    |
| 10 | 0.119585 | 0.476442 |   |
| 11 | 0.112205 | 0.642485 |  |
| 12 | 0        | 0.663325 |  |

|    |          |          |                                                                                      |
|----|----------|----------|--------------------------------------------------------------------------------------|
| 13 | 0.010309 | 0.521110 | 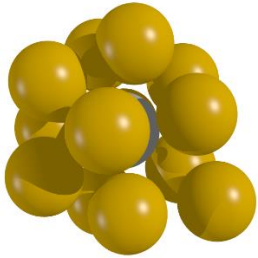  |
| 14 | 0.005510 | 0.413602 |   |
| 15 | 0.052391 | 0.308637 |  |
