# Supplementary material for: Can playing Spirograph lead to an ordered structure in self-propelled particles?
Source: Royal Society of Chemistry journal article supplement (doi:10.1039/d1sm01050f), 2021-01-01
Supplement: d1sm01050f2.pdf [file d1sm01050f2.pdf]

## Supplementary Material description

### 1. Supplementary Material 1

The movie shows the simulation of SPP (yellow circle) for  $N = 1000$  in 2-dimensional system being propelled towards the AP shown as black circle. The coupling parameter  $K_F = 1$  and  $Pe = \infty$ . The line shown in the movie can be considered as tail and shows the propagation direction.

### 2. Supplementary Material 2

The movie shows the simulation of SPP (yellow spheres) for  $N = 1000$  in 3-dimensional system being propelled towards the AP shown as grey sphere. The coupling parameter  $K_F = 1$  and  $Pe = \infty$ . During the dynamics, the movies are zoomed in to have a clear picture of local dynamics around AP.

### 3. Supplementary Material 3

The movie shows the simulation of SPP (yellow spheres) for  $N = 1000$  in 2-dimensional system being propelled towards the AP shown as grey sphere. The coupling parameter  $K_F = 1$  and  $Pe = 1$ . During the dynamics, the movies are zoomed in to have a clear picture of local dynamics around AP.

### 4. Supplementary Material 4

Here we are showing, the structure formed by a finite number of SPP at  $K_F = 1.0$ . The grey sphere is the AP and yellow sphere are SPP.

### 5. Supplementary Material 5

In this movie the SPP is shown in yellow color circle and AP is black in color. The lines shows the trajectory of the particle. Here  $K_F = 0.3$  and  $Pe = \infty$ .

### 6. Supplementary Material 6

The movie shows the simulation of SPP (yellow spheres) for  $N=100$  in 3-dimensional system being propelled towards the AP shown as grey sphere. The coupling parameter  $K_F = 0.2$  and  $Pe = \infty$ . During the dynamics, the movies are zoomed in to have a clear picture of local dynamics around AP.

### 7. Supplementary Material 7

The movie shows the simulation of SPP (yellow spheres) for  $N = 100$  in 3-dimensional system being propelled towards the AP shown as grey sphere. The coupling parameter  $K_F = 0.7$  and  $Pe = \infty$ . During the dynamics, the movies are zoomed in to have a clear picture of local dynamics around AP.
